# Supplementary material
Source: Springer Nature journal article supplement (https://www.springermedizin.de/resource/supplementary/12874_2011_613_MOESM3_ESM.pdf/9432580)
Supplement: MOESM3 [file 9432580]

# Villages Randomized

Control Villages

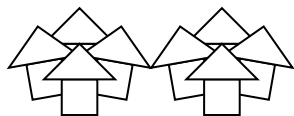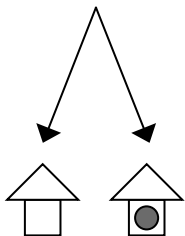

C C  
C NS

Sanitation Mobilization Villages

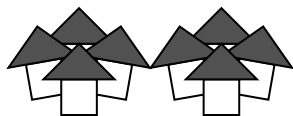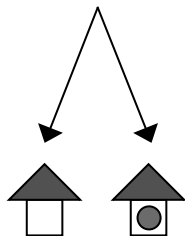

SAN SAN  
C NS

Within each village,  
households are randomly assigned to  
control or to nutritional supplements

← Village-level treatment →  
← Household-level treatment →
